# Supplementary material for: An ionic terfluorene derivative for saturated deep-blue solid state light-emitting electrochemical cells
Source: Royal Society of Chemistry journal article supplement (doi:10.1039/c0jm03446k), 2011-01-01
Supplement: c0jm03446k.pdf [file c0jm03446k.pdf]

## *Supporting Information*

### **An Ionic Terfluorene Derivative for Saturated Deep-Blue Solid State Light-Emitting Electrochemical Cells**

Hsiao-Fan Chen, Chih-Teng Liao, Te-Chuan Chen, Hai-Ching Su\*, Ken-Tsung Wong\* and Tzung-Fang Guo

H.-F. Chen, Prof. K.-T. Wong,  
Department of Chemistry,  
National Taiwan University, Taipei 10617 (Taiwan)  
Fax (+886) 2-3366-1667; Tel: (+886) 2-3366-1665; E-mail: [kenwong@ntu.edu.tw](mailto:kenwong@ntu.edu.tw)

C.-T. Liao, T.-C. Chen, Prof. H.-C. Su  
Institute of Lighting and Energy Photonics,  
National Chiao Tung University, Tainan 71150 (Taiwan)  
Fax: (+886) 6-3032535; Tel.: (+886) 6-3032121#57792;  
E-mail: [haichingsu@mail.nctu.edu.tw](mailto:haichingsu@mail.nctu.edu.tw)

T.-F. Guo  
Institute of Electro-Optical Science & Engineering,  
National Cheng Kung University, Tainan 70101 (Taiwan)

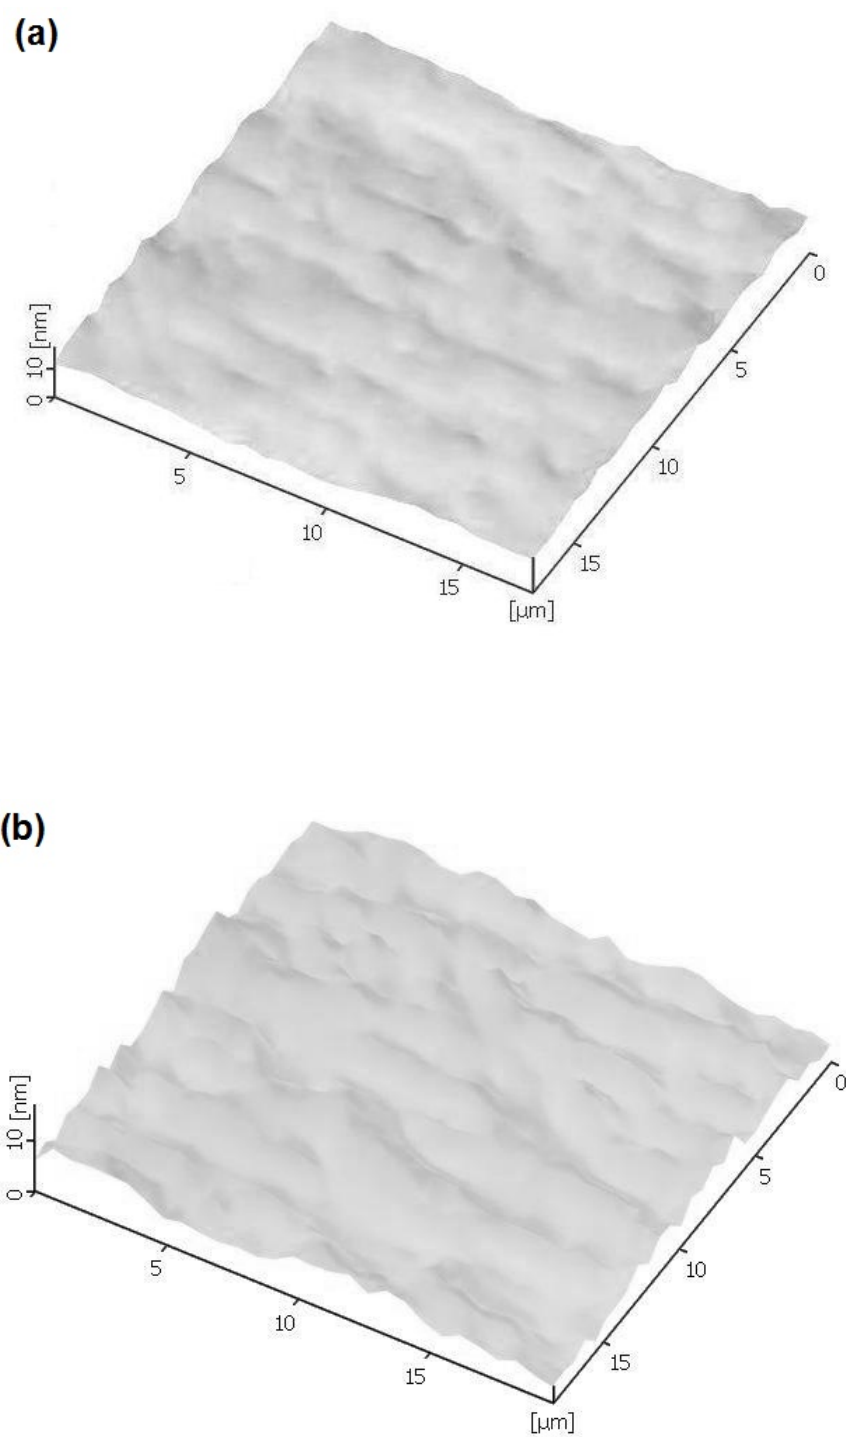

**Fig S1.** 3D AFM (tapping mode) images of (a) a neat film of **1**, (b) a blended film of BMIM·PF<sub>6</sub> and **1** (molar ratio 1:1.77).
